# Supplementary material for: Identification of type III secretion substrates of Chlamydia trachomatis using Yersinia enterocolitica as a heterologous system
Source: PubMed Central journal article supplement (PMC3931295; doi:10.1186/1471-2180-14-40), 2014-02-17
Supplement: 1471-2180-14-40-S2.pdf [file 1471-2180-14-40-S2.pdf]

**Table S2. Primers used in this work for construction of plasmids.**

| Code | Description                                                                                          | <sup>a</sup> Sequence (5'-3')                                                                        | Restriction enzyme |
|------|------------------------------------------------------------------------------------------------------|------------------------------------------------------------------------------------------------------|--------------------|
| 28   | Used to amplify the 5' region of genes cloned in pLJM3 to construct TEM-1 hybrids by overlapping PCR | GATTAAGTTGGGTAACGCC                                                                                  | -                  |
| 30   | Used to construct pFA8 by overlapping PCR                                                            | CACCAGCGTTTCTGGGTGAGGAGTCAC<br>GATTAGAGTAGG                                                          | -                  |
| 31   | Used to construct pFA8 by overlapping PCR                                                            | CCTACTCTAATCGTGACTCCTCACCCA<br>GAAACGCTGGTG                                                          | -                  |
| 34   | Used to construct pFA8 by overlapping PCR                                                            | CACCAGCGTTTCTGGGTGGGAGGCAAT<br>GGCTGCTATTTTC                                                         | -                  |
| 35   | Used to construct pFA10 by overlapping PCR                                                           | GAAAATAGCAGCCATTGCCTCCCACCC<br>AGAAACGCTGGTG                                                         | -                  |
| 36   | Used to construct pFA11 by overlapping PCR                                                           | CACCAGCGTTTCTGGGTGGTGTGCTAT<br>ATCGGACATAGAGTACG                                                     | -                  |
| 37   | Used to construct pFA11 by overlapping PCR                                                           | CGTACTCTATGTCCGATATAGCACACC<br>ACCCAGAAACGCTGGTG                                                     | -                  |
| 40   | Used to construct pFA13 by overlapping PCR                                                           | CACCAGCGTTTCTGGGTGTAAAGAGCC<br>CACGGCAGAAGG                                                          | -                  |
| 41   | Used to construct pFA13 by overlapping PCR                                                           | CCTTCTGCCGTGGGCTCTTTACACCCAG<br>AAACGCTGGTG                                                          | -                  |
| 42   | Used to construct pFA14 by overlapping PCR                                                           | CACCAGCGTTTCTGGGTGTGCCGGCAG<br>GGGCAGTGATGTAG                                                        | -                  |
| 43   | Used to construct pFA14 by overlapping PCR                                                           | CTACATCACTGCCCTGCCGGCACACC<br>CAGAAACGCTGGTG                                                         | -                  |
| 60   | Used to amplify <i>tem-1</i> to construct TEM-1 hybrids                                              | CCCAAGCTTTTACCAATGCTTAATCAG<br>TGAGG                                                                 | HindIII            |
| 67   | Used to amplify <i>tem-1</i> to construct TEM-1 hybrids                                              | GATCCTCGAGTTACCAATGCTTAATCA<br>GTGAGG                                                                | XhoI               |
| 103  | Used to construct pFA38                                                                              | GGAATTCCATATGCTCATTTTTGCCCTT<br>TCTTGTGGGGCAGATGCCTGCTTATGT<br>GCTGCGGATCTTCCACCCAGAAACG<br>CTGGTG   | NdeI               |
| 104  | Used to construct pFA39                                                                              | GGAATTCCATATGGCTAGAAAAGATCG<br>TTTAACTAATGAAAGACTGAATAAGCT<br>ATTTGATAGCCCCTTTCACCCAGAAAC<br>GCTGGTG | NdeI               |
| 106  | Used to construct pFA41                                                                              | GGAATTCCATATGGCTACGGCACAGAT<br>TACTATCCAAGAAGAAATAGAGCAGCT<br>CATAACTAAAGCGATTACCCAGAAAC<br>GCTGGTG  | NdeI               |
| 107  | Used to construct pFA42                                                                              | GGAATTCCATATGACTAAGCCTTCTTTC<br>TTATACGTTATTCAACCTTTTCCGTAT<br>TTAATCCACGATTACCCAGAAACGC<br>TGGTG    | NdeI               |
| 108  | Used to construct pFA43                                                                              | GGAATTCCATATGGTCGAAATTTTAA<br>CTATAGTACCTCGGTATACGAGAAACA<br>CAGCTCTACGAACAAGCACCCAGAAAC<br>GCTGGTG  | NdeI               |

**Table S2. Continued.**

| <b>Code</b> | <b>Description</b>      | <b><sup>a</sup>Sequence (5'-3')</b>                                                                             | <b>Restriction enzyme</b> |
|-------------|-------------------------|-----------------------------------------------------------------------------------------------------------------|---------------------------|
| 109         | Used to construct pFA44 | GGAATTCC <u>CATATG</u> CAAATTCCAAGAAG<br>TGTTGGCACACATGATGGTTCTTTTCAC<br>GCAGATGAAGTGACGCACCCAGAAAC<br>GCTGGTG  | NdeI                      |
| 110         | Used to construct pFA45 | GGAATTCC <u>CATATG</u> CGCAGATCTGTTTG<br>TTACGTTACTCCTTCAGTTGCTAGGGCT<br>GGTCAAATTTCTACCCACCCAGAAACG<br>CTGGTG  | NdeI                      |
| 111         | Used to construct pFA46 | GGAATTCC <u>CATATG</u> ACGACATATCCTGT<br>ACCTCAAATCCTCTTTTATTACGCGTT<br>CTACGCCTGATGGACCACCCAGAAACG<br>CTGGTG   | NdeI                      |
| 112         | Used to construct pFA47 | GGAATTCC <u>CATATG</u> TATTTTACAAGAGA<br>TCCAGTCATAGAGACTGTTATTACATC<br>TAGAGAAGGATATAAGCACCCAGAAA<br>CGCTGGTG  | NdeI                      |
| 113         | Used to construct pFA48 | GGAATTCC <u>CATATG</u> AATATTTCTGGAAG<br>TATCAAACAAAACTTCTCCAGTTTTT<br>GAAAAAGCAAAAATCCCACCCAGAAA<br>CGCTGGTG   | NdeI                      |
| 114         | Used to construct pFA49 | GGAATTCC <u>CATATG</u> AGTAAAAAACATAA<br>GCACAAGCAAGCACACTTCTTCCAA<br>ACCCAAAGTAGAACCTCACCCAGAAAC<br>GCTGGTG    | NdeI                      |
| 115         | Used to construct pFA50 | GGAATTCC <u>CATATG</u> ACGACGAAACCCAA<br>AACTCTAGAAATCGATAACAACACGTT<br>CCTGCTTTTGGAAAGGCCACCCAGAAAC<br>GCTGGTG | NdeI                      |
| 116         | Used to construct pFA51 | GGAATTCC <u>CATATG</u> TCTCGTTTGGATGTT<br>TCTGTATTTGATTCCCTTAGCTAATAAAG<br>AAAAAGCTTCTTACACCCAGAAACGC<br>TGGTG  | NdeI                      |
| 117         | Used to construct pFA52 | GGAATTCC <u>CATATG</u> AAAACGTTAATTGA<br>TAACAACATCGTCAGATTCAAAAATAT<br>TTCTAAAACCAAACAGCACCCAGAAAC<br>GCTGGTG  | NdeI                      |
| 118         | Used to construct pFA53 | GGAATTCC <u>CATATG</u> AAAAATAATTCCGC<br>TCAAAAAATTATAGATTCTATAAAACA<br>AATTCTCTTATTATCACCCAGAAAC<br>GCTGGTG    | NdeI                      |
| 102         | Used to construct pFA37 | GGAATTCC <u>CATATG</u> AAGAAGAGAAAA<br>AGTTGCTGCTTCGCGAGGTTGAAGAAA<br>AGATAACCGCTTCTCAACACCCAGAAA<br>CGCTGGTG   | NdeI                      |
| 120         | Used to construct pFA55 | GGAATTCC <u>CATATG</u> AGTATTTCGACCTAC<br>TAATGGGAGTGGAATGGATACCCGTC<br>TATTAATCCTTCTAACCACCCAGAAAC<br>GCTGGTG  | NdeI                      |
| 122         | Used to construct pFA57 | GGAATTCC <u>CATATG</u> GATATTCCAGAACA<br>GGGCTCAAATACACCAGAAGTAGAGC<br>AAGCAGCTTGCTGCAATCACCCAGAAA<br>CGCTGGTG  | NdeI                      |

**Table S2. Continued.**

| <b>Code</b> | <b>Description</b>                         | <b><sup>a</sup>Sequence (5'-3')</b>                                                                            | <b>Restriction enzyme</b> |
|-------------|--------------------------------------------|----------------------------------------------------------------------------------------------------------------|---------------------------|
| 123         | Used to construct pFA58                    | GGAATTCC <u>CATATG</u> TCAGAAAGCCAAAA<br>ACCTAAAAAATAAATGTTGCTTATG<br>GTTGCGAGGCGTCCTACACCCAGAAAC<br>GCTGGTG   | NdeI                      |
| 124         | Used to construct pFA59                    | GGAATTCC <u>CATATG</u> GAAAAGACTCGTAA<br>GTTTGAAAAAGCTTTAGAGAATTTAGA<br>GCAGTTAAAAAAGATTCACCCAGAAAC<br>GCTGGTG | NdeI                      |
| 125         | Used to construct pFA60                    | GGAATTCC <u>CATATG</u> TCAGCACCAACCTC<br>ACAGGTAGGAGACACACAATACGTCTC<br>CTCGCTACCTCCTTTACACCCAGAAAC<br>GCTGGTG | NdeI                      |
| 169         | Used to construct pRM1                     | GGAATTCC <u>CATATG</u> TCAATTTCTGGAAG<br>TGG                                                                   | NdeI                      |
| 170         | Used to construct pRM1                     | GATCCTCGAGTCAAGCATAATCAGGAA<br>CATCATACGGATATGAATCGCCGCTG<br>CATCCTC                                           | XhoI                      |
| 171         | Used to construct pRM10 by overlapping PCR | CACCAGCGTTTCTGGGTGGATGGATGG<br>GTCAAATCAGG                                                                     | -                         |
| 172         | Used to construct pRM10 by overlapping PCR | CCTGATTTTGACCCATCCATCCACCCA<br>GAAACGCTGGTG                                                                    | -                         |
| 173         | Used to construct pRM7                     | GGAATTCC <u>CATATG</u> TCATTTGGTATTGGT<br>AG                                                                   | NdeI                      |
| 174         | Used to construct pRM7                     | GATCGGT <u>AC</u> CCTAAGCATAATCAGGAA<br>CATCATACGGATAGATAGAGGAGCTTT<br>GCACACC                                 | KpnI                      |
| 175         | Used to construct pRM11 by overlapping PCR | GCCGTTTGTGTGGTTCATCACACCCAG<br>AAACGCTGGTG                                                                     | -                         |
| 176         | Used to construct pRM11 by overlapping PCR | CACCAGCGTTTCTGGGTGTGATGAACC<br>ACACAAACGGC                                                                     | -                         |
| 177         | Used to construct pRM2                     | GGAATTCC <u>CATATG</u> AGTGATTCTGACAA<br>AATTATTAATG                                                           | NdeI                      |
| 178         | Used to construct pRM2                     | GATCGGT <u>AC</u> CCTTAAGCATAATCAGGAA<br>CATCATACGGATATCCTCCTATCTCTGG<br>GTATACG                               | KpnI                      |
| 179         | Used to construct pRM12 by overlapping PCR | CGACTTTAATAACAACCTGTTTCATCACCC<br>AGAAACGCTGGTG                                                                | -                         |
| 180         | Used to construct pRM12 by overlapping PCR | CACCAGCGTTTCTGGGTGATGAACAGT<br>TGTATTAAGTCG                                                                    | -                         |
| 181         | Used to construct pRM3                     | GGAATTCC <u>CATATG</u> AATCAGTATTATTTT<br>TTATCC                                                               | NdeI                      |
| 182         | Used to construct pRM3                     | GATCA <u>AGCTT</u> CTAAGCATAATCAGGAA<br>CATCATACGGATACCATCTGATTCCTTT<br>CTCC                                   | HindIII                   |
| 183         | Used to construct pRM13 by overlapping PCR | CAACCCGAATCTTCTCCTCACCCAGAA<br>ACGCTGGTG                                                                       | -                         |
| 184         | Used to construct pRM13 by overlapping PCR | CACCAGCGTTTCTGGGTGAGGAGAAGA<br>TTCGGGTG                                                                        | -                         |
| 185         | Used to construct pRM18                    | GGAATTCC <u>CATATG</u> CTATTAGATTCTCGT<br>TTCCC                                                                | NdeI                      |

**Table S2. Continued.**

| <b>Code</b> | <b>Description</b>                         | <b><sup>a</sup>Sequence (5'-3')</b>                                      | <b>Restriction enzyme</b> |
|-------------|--------------------------------------------|--------------------------------------------------------------------------|---------------------------|
| 186         | Used to construct pRM18                    | GATCCTCGAGCTAAGCATAATCAGGAA<br>CATCATACGGATAACGAGCTTCCTTAC<br>GGAAAGTTCC | XhoI                      |
| 187         | Used to construct pRM20 by overlapping PCR | CGTATCCTAGAATTAGTCATCCACCCA<br>GAAACGCTGGTG                              | -                         |
| 188         | Used to construct pRM20 by overlapping PCR | CACCAGCGTTTCTGGGTGGATGACTAA<br>TTCTAGGATACG                              | -                         |
| 193         | Used to construct pRM5                     | GGAATTCCATATGGATACTCCCACACC<br>CC                                        | NdeI                      |
| 194         | Used to construct pRM5                     | GATCCTCGAGTTAAGCATAATCAGGAA<br>CATCATACGGATAGGGACGCATGTTGT<br>AG         | XhoI                      |
| 195         | Used to construct pRM15 by overlapping PCR | GCTTCTCTTAAGGGAGAACCACACCCA<br>GAAACGCTGGTG                              | -                         |
| 196         | Used to construct pRM15 by overlapping PCR | CACCAGCGTTTCTGGGTGTGGTTCTCCC<br>TTAAGAGAAGC                              | -                         |
| 197         | Use to construct pRM6                      | GGAATTCCATATGGGAAATATTA AAC<br>CC                                        | NdeI                      |
| 198         | Use to construct pRM6                      | GATCAAGCTTTTAAGCATAATCAGGAA<br>CATCATACGGATATCGATTTCTAGAGT<br>TTGGG      | HindIII                   |
| 199         | Used to construct pRM16 by overlapping PCR | AAACCTACACCCGATAAAATGCACCCA<br>GAAACGCTGGTG                              | -                         |
| 200         | Used to construct pRM16 by overlapping PCR | CACCAGCGTTTCTGGGTGCATTTTATCG<br>GGTGTAGGTTT                              | -                         |
| 206         | Used to construct pFA61                    | GAATTCCATATGAAAGAAGAGAAAA<br>GTTGC                                       | NdeI                      |
| 207         | Used to construct pFA61                    | GATCCTCGAGTTAAGCATAATCAGGAA<br>CATCATACGGATACTCTTGAGTTTTTTC<br>TGC       | XhoI                      |
| 208         | Used to construct pFA62                    | GAATTCCATATGACTAAGCCTTCTTTCT<br>TATACG                                   | NdeI                      |
| 209         | Used to construct pFA62                    | GATCCTCGAGTTAAGCATAATCAGGAA<br>CATCATACGGATAATAACCTGAAGATT<br>TTTTAA     | XhoI                      |
| 212         | Used to construct pFA63                    | GAATTCCATATGGTCGAAATTTTAAAC<br>TATAGTACC                                 | NdeI                      |
| 213         | Used to construct pFA63                    | GATCCTCGAGTTAAGCATAATCAGGAA<br>CATCATACGGATAACCTTGTACGAATT<br>GAAAAATACG | XhoI                      |
| 214         | Used to construct pFA64                    | GAATTCCATATGCAAATCCAAGAAGT<br>GTTGGC                                     | NdeI                      |
| 215         | Used to construct pFA64                    | CCCAAGCTTAAGCATAATCAGGAACAT<br>CATACGGATATACTAATCTCTGCTGTTT<br>TAAC      | HindIII                   |
| 216         | Used to construct pFA65                    | GAATTCCATATGCGCAGATCTGTTTGT<br>ACG                                       | NdeI                      |
| 217         | Used to construct pFA65                    | CCCAAGCTTAAGCATAATCAGGAACAT<br>CATACGGATAGTTAAGATCTATCCAAA<br>TAGG       | HindIII                   |

**Table S2. Continued.**

| <b>Code</b> | <b>Description</b>      | <b><sup>a</sup>Sequence (5'-3')</b>                                     | <b>Restriction enzyme</b> |
|-------------|-------------------------|-------------------------------------------------------------------------|---------------------------|
| 219         | Used to construct pFA66 | GAATTCC <u>CATATG</u> ACGACATATCCTGTACC                                 | NdeI                      |
| 220         | Used to construct pFA66 | GATCCTCGAGTTAAGCATAATCAGGAA<br>CATCATACGGATATGAACGGCTCTTCT<br>TACG      | XhoI                      |
| 221         | Used to construct pFA67 | GAATTCC <u>CATATG</u> TATTTTACAAGAGAT<br>CC                             | NdeI                      |
| 222         | Used to construct pFA67 | GATCCTCGAGTTAAGCATAATCAGGAA<br>CATCATACGGATACTCTTCTGAAGAAA<br>TACTGTC   | XhoI                      |
| 223         | Used to construct pFA68 | GAATTCC <u>CATATG</u> AAAACGTTAATTGAT<br>AAC                            | NdeI                      |
| 224         | Used to construct pFA68 | CCCAAGCTTAAGCATAATCAGGAACAT<br>CATACGGATATAAAACAAATAATTCCTT<br>CAAACCTG | HindIII                   |
| 227         | Used to construct pFA70 | GAATTCCATATGTCAGCACCAACCTCA<br>CAGG                                     | NdeI                      |
| 228         | Used to construct pFA70 | CCCAAGCTTAAGCATAATCAGGAACAT<br>CATACGGATAAGACAGGGTTTATTTA<br>ATTGG      | HindIII                   |
| 229         | Used to construct pMC1  | GGAATTCC <u>CATATG</u> AAAGTCAA AATTAA<br>TGATC                         | NdeI                      |
| 230         | Used to construct pMC1  | GATCAAGCTTTTAAGCATAATCAGGAA<br>CATCATACGGATAAGTATAAAGAACAG<br>CTTTCACG  | HindIII                   |
| 233         | Used to construct pMC7  | GGAATTCCATATGAATAAAAAAAGAAC<br>GAATTAATAAAAAAAACGC                      | NdeI                      |
| 234         | Used to construct pMC7  | GATCGGTACCCTAAGCATAATCAGGAA<br>CATCATACGGATATACTATCTTATTTTT<br>AATC     | KpnI                      |
| 235         | Used to construct pMC2  | GGAATTCCATATGAAAAGTGAGCGTTT<br>AAAAAATTAGAATCAGAGC                      | NdeI                      |
| 236         | Used to construct pMC2  | GATCAAGCTTTTAAGCATAATCAGGAA<br>CATCATACGGATACCATTTCATTCGCGT<br>CAGG     | HindIII                   |
| 237         | Used to construct pMC3  | GGAATTCC <u>CATATG</u> AAAAAAGAAGCA<br>GTCGC                            | NdeI                      |
| 238         | Used to construct pMC3  | GATCAAGCTTCTAAGCATAATCAGGAA<br>CATCATACGGATACAGTTTCACAGAAT<br>ATCGCC    | HindIII                   |
| 241         | Used to construct pMC13 | GGAATTCC <u>CATATG</u> AAGAAACCAGTATT<br>TACAGG                         | NdeI                      |
| 242         | Used to construct pMC13 | GATCCTCGAGTTAAGCATAATCAGGAA<br>CATCATACGGATAATCTGCCTCCTTAT<br>AAGAAG    | XhoI                      |
| 243         | Used to construct pMC5  | GGAATTCCATATGACAACACCAGATAA<br>TAATAC                                   | NdeI                      |
| 244         | Used to construct pMC5  | GATCAAGCTTTTAAGCATAATCAGGAA<br>CATCATACGGATAAGGAACAACAGGT<br>AGCCG      | HindIII                   |

**Table S2. Continued.**

| <b>Code</b> | <b>Description</b>      | <b><sup>a</sup>Sequence (5'-3')</b>                                               | <b>Restriction enzyme</b> |
|-------------|-------------------------|-----------------------------------------------------------------------------------|---------------------------|
| 245         | Used to construct pMC6  | GGAATTCC <u>CATATG</u> GCTAGAAAACCTTT<br>AGTAG                                    | NdeI                      |
| 246         | Used to construct pMC6  | GATCA <u>AAGCTTT</u> CAAGCATAATCAGGAA<br>CATCATACGGATAGTCATAAAAAATTT<br>CCATTTCTG | HindIII                   |
| 247         | Used to construct pMC14 | GGAATTCC <u>CATATG</u> TTTTTCTTGCAAA<br>AAGAC                                     | NdeI                      |
| 248         | Used to construct pMC14 | GATCCT <u>CGAGT</u> CAAGCATAATCAGGAA<br>CATCATACGGATACTCTTGATAGTCTT<br>GCATGG     | XhoI                      |
| 249         | Used to construct pMC20 | GGAATTCC <u>CATATG</u> GAAATCTCCCATAT<br>TTTGG                                    | NdeI                      |
| 250         | Used to construct pMC20 | GATCCT <u>CGAGCT</u> AAGCATAATCAGGAA<br>CATCATACGGATATGACTCAAAGGAA<br>ATC         | XhoI                      |
| 251         | Used to construct pMC22 | GGAATTCC <u>CATATG</u> TCTGAGAGAAAGGT<br>TGAG                                     | NdeI                      |
| 252         | Used to construct pMC22 | GATCCT <u>CGAGCT</u> AAGCATAATCAGGAA<br>CATCATACGGATAATGAGCAAGAGGA<br>AATAGAC     | XhoI                      |
| 253         | Used to construct pMC18 | GGAATTCC <u>CATATG</u> GTGATCCCTAAGGT<br>GG                                       | NdeI                      |
| 254         | Used to construct pMC18 | GATC <u>GGTACCT</u> TAAAGCATAATCAGGAA<br>CATCATACGGATATGGTTGCGTTGAGC<br>CTCC      | KpnI                      |
| 255         | Used to construct pMC15 | GGAATTCC <u>CATATG</u> CAGGAAATCTCGGT<br>ACC                                      | NdeI                      |
| 256         | Used to construct pMC15 | GATCCT <u>CGAGT</u> CAAGCATAATCAGGAA<br>CATCATACGGATATACAGATTCCCCAG<br>GGATAAAAGG | XhoI                      |
| 257         | Used to construct pMC19 | GGAATTCC <u>CATATG</u> GTGTATAGTTATAA<br>AGG                                      | NdeI                      |
| 258         | Used to construct pMC19 | GATC <u>GGTACCCT</u> AAGCATAATCAGGAA<br>CATCATACGGATAAGGTTTTTGAGATA<br>AAAGATACTG | KpnI                      |
| 261         | Used to construct pMC7  | GGAATTCC <u>CATATG</u> AACAGCGAGGGTAA<br>GG                                       | NdeI                      |
| 262         | Used to construct pMC7  | GATCA <u>AAGCTTTT</u> AAGCATAATCAGGAA<br>CATCATACGGATATCTTTCTAAACATA<br>AACACC    | HindIII                   |
| 263         | Used to construct pMC8  | GGAATTCC <u>CATATG</u> GACACGCAATTCAT<br>AGC                                      | NdeI                      |
| 264         | Used to construct pMC8  | GATCA <u>AAGCTTT</u> CAAGCATAATCAGGAA<br>CATCATACGGATAATCTCTGTATACCG<br>AACGC     | HindIII                   |
| 265         | Used to construct pMC9  | GGAATTCC <u>CATATG</u> CACTACGAACCCTA<br>TGATG                                    | NdeI                      |
| 266         | Used to construct pMC9  | GATCA <u>AAGCTTTT</u> AAGCATAATCAGGAA<br>CATCATACGGATATATGAAAGTAGACC<br>ATTTAGACC | HindIII                   |

**Table S2. Continued.**

| <b>Code</b> | <b>Description</b>                         | <b><sup>a</sup>Sequence (5'-3')</b>                                | <b>Restriction enzyme</b> |
|-------------|--------------------------------------------|--------------------------------------------------------------------|---------------------------|
| 267         | Used to construct pMC10                    | GGAATTCCATATGCATTCACTTACTGTT<br>TTTCAAG                            | NdeI                      |
| 268         | Used to construct pMC10                    | GATCAAGCTTCTAAGCATAATCAGGAA<br>CATCATACGGATATGACTTCTGCATAG<br>AGGC | HindIII                   |
| 277         | Used to construct pMC21                    | GGAATTCCATATGTCGCTAGGGACGAC<br>GATTG                               | NdeI                      |
| 278         | Used to construct pMC21                    | GATCAAGCTTCTAAGCATAATCAGGAA<br>CATCATACGGATAATCCTTACAGAGGC<br>TCG  | HindIII                   |
| 325         | Used to construct pMC24 by overlapping PCR | GGGATAAGTACAGAAGAAGGACACCC<br>AGAAACGCTGGTG                        | -                         |
| 326         | Used to construct pMC24 by overlapping PCR | CACCAGCGTTTCTGGGTGTCCTTCTTCT<br>GTACTTATCCC                        | -                         |
| 327         | Used to construct pMC25 by overlapping PCR | CCGACATTTGTACGTTTGAATCACCCA<br>GAAACGCTGGTG                        | -                         |
| 328         | Used to construct pMC25 by overlapping PCR | CACCAGCGTTTCTGGGTGATTCAAACG<br>TACAAATGTCGG                        | -                         |
| 690         | Used to construct pCM12                    | GAATTCATATGAGTATTCGACCTACT<br>AATGG                                | NdeI                      |
| 691         | Used to construct pCM12                    | CCCAAGCTTAAGCATAATCAGGAACAT<br>CATACGGATAGTCTAAGAAAACAGAA<br>GAAG  | HindIII                   |
| 696         | Used to construct pCM13 by overlapping PCR | CACCAGCGTTTCTGGGTGCCATCGAGC<br>AGAAATGTATGG                        | -                         |
| 697         | Used to construct pCM13 by overlapping PCR | CCATACATTTCTGCTCGATGGCACCCA<br>GAAACGCTGGTG                        | -                         |
| 700         | Used to construct pCM4 by overlapping PCR  | CACCAGCGTTTCTGGGTGTGTATTTTCGT<br>TGGATTTTCG                        | -                         |
| 701         | Used to construct pCM4 by overlapping PCR  | CGAAAATCCAACGAAATACACACCCA<br>GAAACGCTGGTG                         | -                         |
| 702         | Used to construct pCM5 by overlapping PCR  | CACCAGCGTTTCTGGGTGCATCCACTG<br>GGTAAGATC                           | -                         |
| 703         | Used to construct pCM5 by overlapping PCR  | GATCTTACCCAGTGGATGCACCCAGAA<br>ACGCTGGTG                           | -                         |
| 704         | Used to construct pCM14 by overlapping PCR | CACCAGCGTTTCTGGGTGATAGTTTCC<br>CGTCTTACG                           | -                         |
| 705         | Used to construct pCM14 by overlapping PCR | CGTAAGACGGGAAACTATCACCCAGA<br>AACGCTGGTG                           | -                         |
| 706         | Used to construct pCM6 by overlapping PCR  | CACCAGCGTTTCTGGGTGATCACAAT<br>AGTCCGATACTTGGG                      | -                         |
| 707         | Used to construct pCM6 by overlapping PCR  | CCCAAGTATCGGACTATTTGTGATCAC<br>CCAGAAACGCTGGTG                     | -                         |
| 708         | Used to construct pCM15 by overlapping PCR | CACCAGCGTTTCTGGGTGCTTTTTGAGT<br>AAGAAAGG                           | -                         |
| 709         | Used to construct pCM15 by overlapping PCR | CCTTTCTTACTCAAAAAGCACCCAGAA<br>ACGCTGGTG                           | -                         |
| 710         | Used to construct pCM16 by overlapping PCR | CACCAGCGTTTCTGGGTGTTCTCTAGG<br>AAGAACCCC                           | -                         |
| 711         | Used to construct pCM16 by overlapping PCR | GGGGTTCTCCTAGAGAACACCCAGAA<br>ACGCTGGTG                            | -                         |

**Table S2. Continued.**

| <b>Code</b> | <b>Description</b>                         | <b><sup>a</sup>Sequence (5'-3')</b>            | <b>Restriction enzyme</b> |
|-------------|--------------------------------------------|------------------------------------------------|---------------------------|
| 712         | Used to construct pCM17 by overlapping PCR | CACCAGCGTTTCTGGGTGAAATTTTAA<br>TAATTTGTTACG    | -                         |
| 713         | Used to construct pCM17 by overlapping PCR | CGTAACAAATTATTTAAAATTTACCCA<br>GAAACGCTGGTG    | -                         |
| 714         | Used to construct pCM18 by overlapping PCR | CACCAGCGTTTCTGGGTGAGTAAGCTT<br>GTAACCCAG       | -                         |
| 715         | Used to construct pCM18 by overlapping PCR | CTGGGTTACAAGCTTACTCACCCAGAA<br>ACGCTGGTG       | -                         |
| 716         | Used to construct pCM19 by overlapping PCR | CACCAGCGTTTCTGGGTGCAGAAGGCG<br>CTGTATAAC       | -                         |
| 717         | Used to construct pCM19 by overlapping PCR | GTTATACAGCGCCTTCTGCACCCAGAA<br>ACGCTGGTG       | -                         |
| 718         | Used to construct pCM20 by overlapping PCR | CACCAGCGTTTCTGGGTGTCCTACAGT<br>TTCAAAAGG       | -                         |
| 719         | Used to construct pCM20 by overlapping PCR | CCTTTTGAAACTGTAGGACACCCAGAA<br>ACGCTGGTG       | -                         |
| 722         | Used to construct pCM21 by overlapping PCR | CACCAGCGTTTCTGGGTGTAGTAAAAA<br>ACAACGTTTTTCG   | -                         |
| 723         | Used to construct pCM21 by overlapping PCR | CGAAAACGTTGTTTTTTACTACACCCA<br>GAAACGCTGGTG    | -                         |
| 724         | Used to construct pCM8 by overlapping PCR  | CACCAGCGTTTCTGGGTGTGAAACAGA<br>AGTAACTTC       | -                         |
| 725         | Used to construct pCM8 by overlapping PCR  | GAAGTTACTTCTGTTTCACACCCAGAA<br>ACGCTGGTG       | -                         |
| 726         | Used to construct pCM9 by overlapping PCR  | CACCAGCGTTTCTGGGTGGCAGATGAG<br>ATGATCTAG       | -                         |
| 727         | Used to construct pCM9 by overlapping PCR  | CTAGATCATCTCATCTGCCACCCAGAA<br>ACGCTGGTG       | -                         |
| 728         | Used to construct pCM22 by overlapping PCR | CACCAGCGTTTCTGGGTGGGGGTAGGG<br>CTTTTCTGTGTAGCG | -                         |
| 729         | Used to construct pCM22 by overlapping PCR | CGCTACACAGAAAAGCCCTACCCCCAC<br>CCAGAAACGCTGGTG | -                         |
| 732         | Used to construct pCM11 by overlapping PCR | CACCAGCGTTTCTGGGTGCATAGGCTG<br>TAAAAGATC       | -                         |
| 733         | Used to construct pCM11 by overlapping PCR | GATCTTTTACAGCCTATGCACCCAGAA<br>ACGCTGGTG       | -                         |

<sup>a</sup>Sites of restriction enzymes are underlined
