# Supplementary material for: Identification of type III secretion substrates of Chlamydia trachomatis using Yersinia enterocolitica as a heterologous system
Source: BMC Microbiol. 2014 Feb 17;14:40. doi: 10.1186/1471-2180-14-40 (PMC3931295; doi:10.1186/1471-2180-14-40)
Supplement: Additional file 1: Table S1 — Plasmids used and constructed in this work. [file 1471-2180-14-40-S1.pdf]

**Table S1. Plasmids used and constructed in this work.**

| <b>Plasmid</b> | <b>Description</b>                                                                                                    | <b>Reference<sup>a</sup> or source</b> |
|----------------|-----------------------------------------------------------------------------------------------------------------------|----------------------------------------|
| pCX340         | Derivative of pBR322. Expresses mature TEM-1 $\beta$ -lactamase                                                       | [1]                                    |
| pLJM3          | Low copy vector, derivative of pBBR1MCS-2 [2]. Expresses YopE under the control of its own promoter ( <i>PyopE</i> ). | [3]                                    |
| pFA1           | Derivative of pLJM3. Expresses IncA under the control of <i>PyopE</i>                                                 | [4]                                    |
| pFA2           | Derivative of pLJM3. Expresses IncC under the control of <i>PyopE</i>                                                 | [4]                                    |
| pFA3           | Derivative of pLJM3. Expresses TEM-1 under the control of <i>PyopE</i>                                                | [4]                                    |
| pFA8           | Derivative of pLJM3. Expresses IncA <sub>10</sub> -TEM-1 under the control of <i>PyopE</i>                            | This study                             |
| pFA9           | Derivative of pLJM3. Expresses IncA <sub>20</sub> -TEM-1 under the control of <i>PyopE</i>                            | [4]                                    |
| pFA10          | Derivative of pLJM3. Expresses IncA <sub>40</sub> -TEM-1 under the control of <i>PyopE</i>                            | This study                             |
| pFA11          | Derivative of pLJM3. Expresses IncC <sub>10</sub> -TEM-1 under the control of <i>PyopE</i>                            | This study                             |
| pFA12          | Derivative of pLJM3. Expresses IncC <sub>20</sub> -TEM-1 under the control of <i>PyopE</i>                            | [4]                                    |
| pFA13          | Derivative of pLJM3. Expresses IncC <sub>40</sub> -TEM-1 under the control of <i>PyopE</i>                            | This study                             |
| pFA14          | Derivative of pLJM3. Expresses YopE <sub>15</sub> -TEM-1 under the control of <i>PyopE</i>                            | This study                             |
| pFA19          | Derivative of pLJM3. Expresses SycT <sub>20</sub> -TEM-1 under the control of <i>PyopE</i>                            | [4]                                    |
| pCM13          | Derivative of pLJM3. Expresses CT016 <sub>20</sub> -TEM-1 under the control of <i>PyopE</i>                           | This study                             |
| pFA38          | Derivative of pLJM3. Expresses CT017 <sub>20</sub> -TEM-1 under the control of <i>PyopE</i>                           | This study                             |
| pFA39          | Derivative of pLJM3. Expresses CT031 <sub>20</sub> -TEM-1 under the control of <i>PyopE</i>                           | This study                             |
| pCM4           | Derivative of pLJM3. Expresses CT051 <sub>20</sub> -TEM-1 under the control of <i>PyopE</i>                           | This study                             |
| pCM5           | Derivative of pLJM3. Expresses CT053 <sub>20</sub> -TEM-1 under the control of <i>PyopE</i>                           | This study                             |
| pFA41          | Derivative of pLJM3. Expresses CT066 <sub>20</sub> -TEM-1 under the control of <i>PyopE</i>                           | This study                             |
| pCM14          | Derivative of pLJM3. Expresses CT080 <sub>20</sub> -TEM-1 under the control of <i>PyopE</i>                           | This study                             |
| pRM10          | Derivative of pLJM3. Expresses CT082 <sub>20</sub> -TEM-1 under the control of <i>PyopE</i>                           | This study                             |
| pRM11          | Derivative of pLJM3. Expresses CT105 <sub>20</sub> -TEM-1 under the control of <i>PyopE</i>                           | This study                             |
| pRM12          | Derivative of pLJM3. Expresses CT142 <sub>20</sub> -TEM-1 under the control of <i>PyopE</i>                           | This study                             |
| pMC24          | Derivative of pLJM3. Expresses CT143 <sub>20</sub> -TEM-1 under the control of <i>PyopE</i>                           | This study                             |
| pMC25          | Derivative of pLJM3. Expresses CT144 <sub>20</sub> -TEM-1 under the control of <i>PyopE</i>                           | This study                             |
| pFA42          | Derivative of pLJM3. Expresses CT153 <sub>20</sub> -TEM-1 under the control of <i>PyopE</i>                           | This study                             |

**Table S1. Continued.**

| <b>Plasmid</b> | <b>Description</b>                                                                          | <b>Reference or source</b> |
|----------------|---------------------------------------------------------------------------------------------|----------------------------|
| pCM6           | Derivative of pLJM3. Expresses CT161 <sub>20</sub> -TEM-1 under the control of <i>PyopE</i> | This study                 |
| pCM15          | Derivative of pLJM3. Expresses CT172 <sub>20</sub> -TEM-1 under the control of <i>PyopE</i> | This study                 |
| pCM16          | Derivative of pLJM3. Expresses CT203 <sub>20</sub> -TEM-1 under the control of <i>PyopE</i> | This study                 |
| pFA43          | Derivative of pLJM3. Expresses CT273 <sub>20</sub> -TEM-1 under the control of <i>PyopE</i> | This study                 |
| pCM17          | Derivative of pLJM3. Expresses CT277 <sub>20</sub> -TEM-1 under the control of <i>PyopE</i> | This study                 |
| pCM18          | Derivative of pLJM3. Expresses CT289 <sub>20</sub> -TEM-1 under the control of <i>PyopE</i> | This study                 |
| pRM13          | Derivative of pLJM3. Expresses CT309 <sub>20</sub> -TEM-1 under the control of <i>PyopE</i> | This study                 |
| pCM19          | Derivative of pLJM3. Expresses CT330 <sub>20</sub> -TEM-1 under the control of <i>PyopE</i> | This study                 |
| pCM20          | Derivative of pLJM3. Expresses CT338 <sub>20</sub> -TEM-1 under the control of <i>PyopE</i> | This study                 |
| pFA44          | Derivative of pLJM3. Expresses CT386 <sub>20</sub> -TEM-1 under the control of <i>PyopE</i> | This study                 |
| pFA45          | Derivative of pLJM3. Expresses CT425 <sub>20</sub> -TEM-1 under the control of <i>PyopE</i> | This study                 |
| pFA46          | Derivative of pLJM3. Expresses CT429 <sub>20</sub> -TEM-1 under the control of <i>PyopE</i> | This study                 |
| pFA47          | Derivative of pLJM3. Expresses CT504 <sub>20</sub> -TEM-1 under the control of <i>PyopE</i> | This study                 |
| pFA48          | Derivative of pLJM3. Expresses CT538 <sub>20</sub> -TEM-1 under the control of <i>PyopE</i> | This study                 |
| pCM21          | Derivative of pLJM3. Expresses CT568 <sub>20</sub> -TEM-1 under the control of <i>PyopE</i> | This study                 |
| pFA49          | Derivative of pLJM3. Expresses CT577 <sub>20</sub> -TEM-1 under the control of <i>PyopE</i> | This study                 |
| pRM16          | Derivative of pLJM3. Expresses CT583 <sub>20</sub> -TEM-1 under the control of <i>PyopE</i> | This study                 |
| pFA50          | Derivative of pLJM3. Expresses CT584 <sub>20</sub> -TEM-1 under the control of <i>PyopE</i> | This study                 |
| pFA51          | Derivative of pLJM3. Expresses CT590 <sub>20</sub> -TEM-1 under the control of <i>PyopE</i> | This study                 |
| pFA52          | Derivative of pLJM3. Expresses CT631 <sub>20</sub> -TEM-1 under the control of <i>PyopE</i> | This study                 |
| pFA53          | Derivative of pLJM3. Expresses CT635 <sub>20</sub> -TEM-1 under the control of <i>PyopE</i> | This study                 |
| pCM8           | Derivative of pLJM3. Expresses CT656 <sub>20</sub> -TEM-1 under the control of <i>PyopE</i> | This study                 |
| pRM20          | Derivative of pLJM3. Expresses CT696 <sub>20</sub> -TEM-1 under the control of <i>PyopE</i> | This study                 |
| pCM9           | Derivative of pLJM3. Expresses CT702 <sub>20</sub> -TEM-1 under the control of <i>PyopE</i> | This study                 |
| pFA57          | Derivative of pLJM3. Expresses CT768 <sub>20</sub> -TEM-1 under the control of <i>PyopE</i> | This study                 |

**Table S1. Continued.**

| <b>Plasmid</b> | <b>Description</b>                                                                          | <b>Reference or source</b> |
|----------------|---------------------------------------------------------------------------------------------|----------------------------|
| pCM22          | Derivative of pLJM3. Expresses CT779 <sub>20</sub> -TEM-1 under the control of <i>PyopE</i> | This study                 |
| pFA58          | Derivative of pLJM3. Expresses CT814 <sub>20</sub> -TEM-1 under the control of <i>PyopE</i> | This study                 |
| pFA59          | Derivative of pLJM3. Expresses CT837 <sub>20</sub> -TEM-1 under the control of <i>PyopE</i> | This study                 |
| pCM11          | Derivative of pLJM3. Expresses CT845 <sub>20</sub> -TEM-1 under the control of <i>PyopE</i> | This study                 |
| pFA60          | Derivative of pLJM3. Expresses CT849 <sub>20</sub> -TEM-1 under the control of <i>PyopE</i> | This study                 |
| pRM15          | Derivative of pLJM3. Expresses CT863 <sub>20</sub> -TEM-1 under the control of <i>PyopE</i> | This study                 |
| pFA37          | Derivative of pLJM3. Expresses RplJ <sub>20</sub> -TEM-1 under the control of <i>PyopE</i>  | This study                 |
| pFA55          | Derivative of pLJM3. Expresses CT694 <sub>20</sub> -TEM-1 under the control of <i>PyopE</i> | This study                 |
| pMC1           | Derivative of pLJM3. Expresses CT016-HA under the control of <i>PyopE</i>                   | This study                 |
| pMC7           | Derivative of pLJM3. Expresses CT051-HA under the control of <i>PyopE</i>                   | This study                 |
| pMC2           | Derivative of pLJM3. Expresses CT053-HA under the control of <i>PyopE</i>                   | This study                 |
| pMC3           | Derivative of pLJM3. Expresses CT080-HA under the control of <i>PyopE</i>                   | This study                 |
| pRM1           | Derivative of pLJM3. Expresses CT082-HA under the control of <i>PyopE</i>                   | This study                 |
| pRM7           | Derivative of pLJM3. Expresses CT105-HA under the control of <i>PyopE</i>                   | This study                 |
| pRM2           | Derivative of pLJM3. Expresses CT142-HA under the control of <i>PyopE</i>                   | This study                 |
| pMC13          | Derivative of pLJM3. Expresses CT143-HA under the control of <i>PyopE</i>                   | This study                 |
| pMC5           | Derivative of pLJM3. Expresses CT144-HA under the control of <i>PyopE</i>                   | This study                 |
| pFA62          | Derivative of pLJM3. Expresses CT153-HA under the control of <i>PyopE</i>                   | This study                 |
| pMC6           | Derivative of pLJM3. Expresses CT161-HA under the control of <i>PyopE</i>                   | This study                 |
| pMC14          | Derivative of pLJM3. Expresses CT172-HA under the control of <i>PyopE</i>                   | This study                 |
| pMC20          | Derivative of pLJM3. Expresses CT203-HA under the control of <i>PyopE</i>                   | This study                 |
| pFA63          | Derivative of pLJM3. Expresses CT273-HA under the control of <i>PyopE</i>                   | This study                 |
| pMC22          | Derivative of pLJM3. Expresses CT277-HA under the control of <i>PyopE</i>                   | This study                 |
| pMC18          | Derivative of pLJM3. Expresses CT289-HA under the control of <i>PyopE</i>                   | This study                 |
| pRM3           | Derivative of pLJM3. Expresses CT309-HA under the control of <i>PyopE</i>                   | This study                 |

**Table S1. Continued.**

| <b>Plasmid</b> | <b>Description</b>                                                        | <b>Reference or source</b> |
|----------------|---------------------------------------------------------------------------|----------------------------|
| pMC15          | Derivative of pLJM3. Expresses CT330-HA under the control of <i>PyopE</i> | This study                 |
| pMC19          | Derivative of pLJM3. Expresses CT338-HA under the control of <i>PyopE</i> | This study                 |
| pFA64          | Derivative of pLJM3. Expresses CT386-HA under the control of <i>PyopE</i> | This study                 |
| pFA65          | Derivative of pLJM3. Expresses CT425-HA under the control of <i>PyopE</i> | This study                 |
| pFA66          | Derivative of pLJM3. Expresses CT429-HA under the control of <i>PyopE</i> | This study                 |
| pFA67          | Derivative of pLJM3. Expresses CT504-HA under the control of <i>PyopE</i> | This study                 |
| pMC7           | Derivative of pLJM3. Expresses CT568-HA under the control of <i>PyopE</i> | This study                 |
| pRM6           | Derivative of pLJM3. Expresses CT583-HA under the control of <i>PyopE</i> | This study                 |
| pFA68          | Derivative of pLJM3. Expresses CT631-HA under the control of <i>PyopE</i> | This study                 |
| pMC8           | Derivative of pLJM3. Expresses CT656-HA under the control of <i>PyopE</i> | This study                 |
| pCM12          | Derivative of pLJM3. Expresses CT694-HA under the control of <i>PyopE</i> | This study                 |
| pRM18          | Derivative of pLJM3. Expresses CT696-HA under the control of <i>PyopE</i> | This study                 |
| pMC9           | Derivative of pLJM3. Expresses CT702-HA under the control of <i>PyopE</i> | This study                 |
| pMC10          | Derivative of pLJM3. Expresses CT779-HA under the control of <i>PyopE</i> | This study                 |
| pMC21          | Derivative of pLJM3. Expresses CT845-HA under the control of <i>PyopE</i> | This study                 |
| pFA70          | Derivative of pLJM3. Expresses CT849-HA under the control of <i>PyopE</i> | This study                 |
| pRM5           | Derivative of pLJM3. Expresses CT863-HA under the control of <i>PyopE</i> | This study                 |
| pFA61          | Derivative of pLJM3. Expresses RplJ-HA under the control of <i>PyopE</i>  | This study                 |

1. Charpentier X, Oswald E: **Identification of the secretion and translocation domain of the enteropathogenic and enterohemorrhagic *Escherichia coli* effector Cif, using TEM-1 beta-lactamase as a new fluorescence-based reporter.** *J Bacteriol* 2004, **186**(16):5486-5495.
2. Kovach ME, Elzer PE, Hill DS, Robertson GT, Farris MA, Roop II RM, Peterson KM: **Four new derivatives of the broad-host-range cloning vector pBBR1MCS, carrying different antibiotic-resistance cassettes.** *Gene* 1995, **166**:175-176.
3. Marenne MN, Journet L, Mota LJ, Cornelis GR: **Genetic analysis of the formation of the Ysc-Yop translocation pore in macrophages by *Yersinia enterocolitica*: role of LcrV, YscF and YopN.** *Microb Pathog* 2003, **35**(6):243-258.
4. Almeida F, Borges V, Ferreira R, Borrego MJ, Gomes JP, Mota LJ: **Polymorphisms in Inc Proteins and Differential Expression of *inc* Genes among *Chlamydia trachomatis* Strains Correlate with Invasiveness and Tropism of Lymphogranuloma Venereum Isolates.** *J Bacteriol* 2012, **194**(23):6574-6585.
